# Supplementary material for: Contribution of gross chromosomal changes to HPV16-induced transformation
Source: Royal Society of Chemistry journal article supplement (doi:10.1039/c0mb00284d), 2011-02-24
Supplement: c0mb00284d.pdf [file c0mb00284d.pdf]

Supplemental data

Table of Contents

|                                                                                                                                                                                                           | Page number |
|-----------------------------------------------------------------------------------------------------------------------------------------------------------------------------------------------------------|-------------|
| Supplemental figure legends (for Figures S1, S2, S3, S4)                                                                                                                                                  | 2           |
| Figure S5 Probability of random overlap between genes participating in the apoptotic network with at least 2 fold reduced expression in the BP cells and all the BP genes located in large reduced region | 7           |
| Calculation of contribution of global chromosomal alterations to the changes in the general enzymatic activity of the transformed BP cells                                                                | 8           |
| <i>Derivation of flux equation for networks</i>                                                                                                                                                           | 8           |
| <i>Flux change due to global chromosomal alterations</i>                                                                                                                                                  | 12          |
| References for Supplemental data                                                                                                                                                                          | 14          |
| Table SI Primers used in mapping of the viral HPV16 insertion in HF1 cells                                                                                                                                | 15          |

### Supplemental figure legends

**Fig. S1 The majority of genes on chromosome 4 were found in large zones that showed coordinately reduced expression in BP cells.** DIGMAP analysis was performed as described in Fig. 1. The entire chromosome showed a gradual reduction in expression in the course of HF1 transformation. (A: triplicate K samples, B: triplicate E samples, C: triplicate L samples, D: triplicate BP samples)

**Fig. S2 The majority of transcripts on chromosome 18 were located within large chromosomal zones with reduced expression in BP cells.** DIGMAP analysis was performed as described in Fig. 1. The entire chromosome showed a gradual reduction in expression in the course of HF1 transformation.

**Fig. S3 Chromosome 5p has large chromosomal zones with induced expression in BP cells.** DIGMAP analysis was performed as described in Fig. 1. Long regions with induced expression in BP cells were observed on chromosome 5.

**Fig. S4 Chromosome 3p has large chromosomal zones with reduced expression in BP cells.** DIGMAP analysis was performed as described in Fig. 1. Long regions with reduced expression in BP cells were observed on chromosome 3p.

Fig.S1

# AAA BBB CCC DDD

Supplementary Material (ESI) for Molecular BioSystems  
This journal is © The Royal Society of Chemistry, 2011

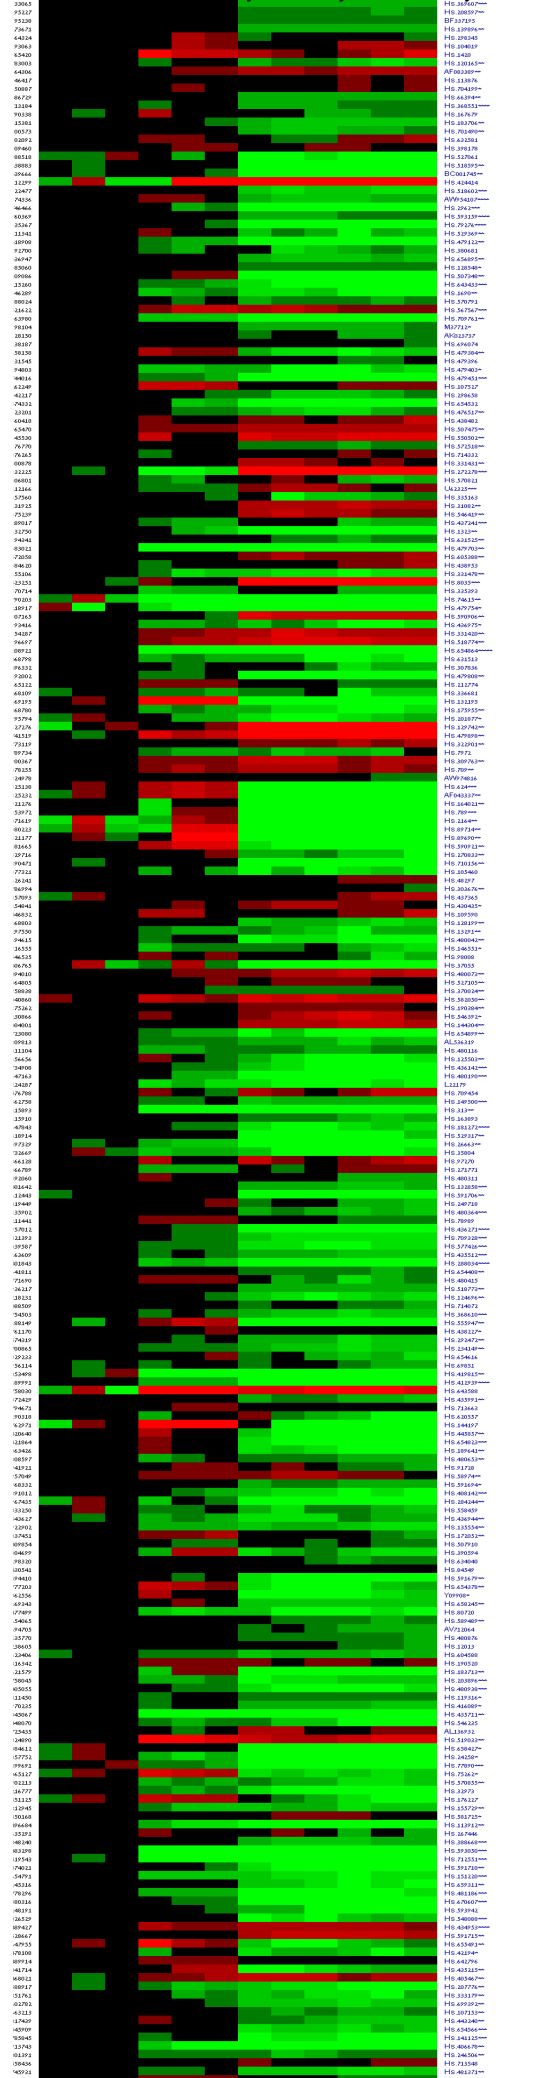

- Fig. 20727
- Fig. 20845
- Fig. 20979
- Fig. 21095
- Fig. 21245
- Fig. 21420
- Fig. 21600
- Fig. 21785
- Fig. 21975
- Fig. 22170
- Fig. 22370
- Fig. 22575
- Fig. 22785
- Fig. 22995
- Fig. 23210
- Fig. 23430
- Fig. 23655
- Fig. 23885
- Fig. 24120
- Fig. 24360
- Fig. 24605
- Fig. 24855
- Fig. 25110
- Fig. 25370
- Fig. 25635
- Fig. 25905
- Fig. 26180
- Fig. 26460
- Fig. 26745
- Fig. 27035
- Fig. 27330
- Fig. 27630
- Fig. 27935
- Fig. 28245
- Fig. 28560
- Fig. 28880
- Fig. 29205
- Fig. 29535
- Fig. 29870
- Fig. 30210
- Fig. 30555
- Fig. 30905
- Fig. 31260
- Fig. 31620
- Fig. 31985
- Fig. 32355
- Fig. 32730
- Fig. 33110
- Fig. 33495
- Fig. 33885
- Fig. 34280
- Fig. 34680
- Fig. 35085
- Fig. 35495
- Fig. 35910
- Fig. 36330
- Fig. 36755
- Fig. 37185
- Fig. 37620
- Fig. 38060
- Fig. 38505
- Fig. 38955
- Fig. 39410
- Fig. 39870
- Fig. 40335
- Fig. 40805
- Fig. 41280
- Fig. 41760
- Fig. 42245
- Fig. 42735
- Fig. 43230
- Fig. 43730
- Fig. 44235
- Fig. 44745
- Fig. 45260
- Fig. 45780
- Fig. 46305
- Fig. 46835
- Fig. 47370
- Fig. 47910
- Fig. 48455
- Fig. 49005
- Fig. 49560
- Fig. 50120
- Fig. 50685
- Fig. 51255
- Fig. 51830
- Fig. 52410
- Fig. 52995
- Fig. 53585
- Fig. 54180
- Fig. 54780
- Fig. 55385
- Fig. 55995
- Fig. 56610
- Fig. 57230
- Fig. 57855
- Fig. 58485
- Fig. 59120
- Fig. 59760
- Fig. 60405
- Fig. 61055
- Fig. 61710
- Fig. 62370
- Fig. 63035
- Fig. 63705
- Fig. 64380
- Fig. 65060
- Fig. 65745
- Fig. 66435
- Fig. 67130
- Fig. 67830
- Fig. 68535
- Fig. 69245
- Fig. 69960
- Fig. 70680
- Fig. 71405
- Fig. 72135
- Fig. 72870
- Fig. 73610
- Fig. 74355
- Fig. 75105
- Fig. 75860
- Fig. 76620
- Fig. 77385
- Fig. 78155
- Fig. 78930
- Fig. 79710
- Fig. 80495
- Fig. 81285
- Fig. 82085
- Fig. 82890
- Fig. 83700
- Fig. 84515
- Fig. 85335
- Fig. 86160
- Fig. 86990
- Fig. 87825
- Fig. 88665
- Fig. 89515
- Fig. 90370
- Fig. 91230
- Fig. 92095
- Fig. 92965
- Fig. 93840
- Fig. 94720
- Fig. 95605
- Fig. 96495
- Fig. 97390
- Fig. 98290
- Fig. 99195
- Fig. 100105
- Fig. 101020
- Fig. 101940
- Fig. 102865
- Fig. 103795
- Fig. 104730
- Fig. 105670
- Fig. 106615
- Fig. 107565
- Fig. 108520
- Fig. 109480
- Fig. 110445
- Fig. 111415
- Fig. 112390
- Fig. 113370
- Fig. 114355
- Fig. 115345
- Fig. 116340
- Fig. 117340
- Fig. 118345
- Fig. 119355
- Fig. 120370
- Fig. 121390
- Fig. 122415
- Fig. 123445
- Fig. 124480
- Fig. 125520
- Fig. 126565
- Fig. 127615
- Fig. 128670
- Fig. 129730
- Fig. 130795
- Fig. 131865
- Fig. 132940
- Fig. 134020
- Fig. 135105
- Fig. 136195
- Fig. 137290
- Fig. 138390
- Fig. 139495
- Fig. 140605
- Fig. 141720
- Fig. 142840
- Fig. 143965
- Fig. 145095
- Fig. 146230
- Fig. 147365
- Fig. 148505
- Fig. 149650
- Fig. 150800
- Fig. 151955
- Fig. 153115
- Fig. 154280
- Fig. 155445
- Fig. 156615
- Fig. 157790
- Fig. 158965
- Fig. 160145
- Fig. 161330
- Fig. 162515
- Fig. 163705
- Fig. 164900
- Fig. 166095
- Fig. 167295
- Fig. 168500
- Fig. 169705
- Fig. 170915
- Fig. 172130
- Fig. 173345
- Fig. 174565
- Fig. 175790
- Fig. 177015
- Fig. 178245
- Fig. 179480
- Fig. 180715
- Fig. 181955
- Fig. 183200
- Fig. 184445
- Fig. 185695
- Fig. 186950
- Fig. 188205
- Fig. 189465
- Fig. 190725
- Fig. 191990
- Fig. 193255
- Fig. 194525
- Fig. 195800
- Fig. 197075
- Fig. 198355
- Fig. 199640
- Fig. 200925
- Fig. 202215
- Fig. 203510
- Fig. 204805
- Fig. 206105
- Fig. 207410
- Fig. 208715
- Fig. 210025
- Fig. 211340
- Fig. 212655
- Fig. 213975
- Fig. 215295
- Fig. 216615
- Fig. 217940
- Fig. 219265
- Fig. 220595
- Fig. 221930
- Fig. 223265
- Fig. 224605
- Fig. 225945
- Fig. 227290
- Fig. 228635
- Fig. 229985
- Fig. 231340
- Fig. 232695
- Fig. 234055
- Fig. 235415
- Fig. 236780
- Fig. 238145
- Fig. 239510
- Fig. 240880
- Fig. 242255
- Fig. 243630
- Fig. 245010
- Fig. 246390
- Fig. 247775
- Fig. 249165
- Fig. 250560
- Fig. 251955
- Fig. 253355
- Fig. 254760
- Fig. 256165
- Fig. 257575
- Fig. 258985
- Fig. 260400
- Fig. 261815
- Fig. 263235
- Fig. 264655
- Fig. 266075
- Fig. 267495
- Fig. 268920
- Fig. 270345
- Fig. 271770
- Fig. 273195
- Fig. 274625
- Fig. 276055
- Fig. 277485
- Fig. 278920
- Fig. 280355
- Fig. 281795
- Fig. 283240
- Fig. 284685
- Fig. 286135
- Fig. 287585
- Fig. 289040
- Fig. 290495
- Fig. 291955
- Fig. 293415
- Fig. 294880
- Fig. 296345
- Fig. 297810
- Fig. 299280
- Fig. 300745
- Fig. 302215
- Fig. 303690
- Fig. 305165
- Fig. 306640
- Fig. 308120
- Fig. 309605
- Fig. 311090
- Fig. 312580
- Fig. 314075
- Fig. 315570
- Fig. 317065
- Fig. 318565
- Fig. 320065
- Fig. 321570
- Fig. 323075
- Fig. 324585
- Fig. 326095
- Fig. 327605
- Fig. 329115
- Fig. 330630
- Fig. 332145
- Fig. 333660
- Fig. 335175
- Fig. 336695
- Fig. 338215
- Fig. 339735
- Fig. 341255
- Fig. 342775
- Fig. 344295
- Fig. 345815
- Fig. 347340
- Fig. 348865
- Fig. 350390
- Fig. 351915
- Fig. 353445
- Fig. 354975
- Fig. 356505
- Fig. 358040
- Fig. 359575
- Fig. 361115
- Fig. 362655
- Fig. 364195
- Fig. 365740
- Fig. 367285
- Fig. 368835
- Fig. 370385
- Fig. 371935
- Fig. 373485
- Fig. 375040
- Fig. 376595
- Fig. 378155
- Fig. 379715
- Fig. 381280
- Fig. 382845
- Fig. 384410
- Fig. 385975
- Fig. 387545
- Fig. 389115
- Fig. 390685
- Fig. 392255
- Fig. 393830
- Fig. 395405
- Fig. 396985
- Fig. 398565
- Fig. 400145
- Fig. 401725
- Fig. 403310
- Fig. 404895
- Fig. 406480
- Fig. 408065
- Fig. 409655
- Fig. 411245
- Fig. 412840
- Fig. 414435
- Fig. 416030
- Fig. 417625
- Fig. 419225
- Fig. 420825
- Fig. 422430
- Fig. 424035
- Fig. 425640
- Fig. 427245
- Fig. 428855
- Fig. 430465
- Fig. 432075
- Fig. 433685
- Fig. 435295
- Fig. 436905
- Fig. 438515
- Fig. 440125
- Fig. 441735
- Fig. 443345
- Fig. 444955
- Fig. 446565
- Fig. 448175
- Fig. 449785
- Fig. 451395
- Fig. 453005
- Fig. 454615
- Fig. 456225
- Fig. 457835
- Fig. 459445
- Fig. 461055
- Fig. 462665
- Fig. 464275
- Fig. 465885
- Fig. 467495
- Fig. 469105
- Fig. 470715
- Fig. 472325
- Fig. 473935
- Fig. 475545
- Fig. 477155
- Fig. 478765
- Fig. 480375
- Fig. 481985
- Fig. 483595
- Fig. 485205
- Fig. 486815
- Fig. 488425
- Fig. 490035
- Fig. 491645
- Fig. 493255
- Fig. 494865
- Fig. 496475
- Fig. 498085
- Fig. 499695
- Fig. 501305
- Fig. 502915
- Fig. 504525
- Fig. 506135
- Fig. 507745
- Fig. 509355
- Fig. 510965
- Fig. 512575
- Fig. 514185
- Fig. 515795
- Fig. 517405
- Fig. 519015
- Fig. 520625
- Fig. 522235
- Fig. 523845
- Fig. 525455
- Fig. 527065
- Fig. 528675
- Fig. 530285
- Fig. 531895
- Fig. 533505
- Fig. 535115
- Fig. 536725
- Fig. 538335
- Fig. 539945
- Fig. 541555
- Fig. 543165
- Fig. 544775
- Fig. 546385
- Fig. 547995
- Fig. 549605
- Fig. 551215
- Fig. 552825
- Fig. 554435
- Fig. 556045
- Fig. 557655
- Fig. 559265
- Fig. 560875
- Fig. 562485
- Fig. 564095
- Fig. 565705
- Fig. 567315
- Fig. 568925
- Fig. 570535
- Fig. 572145
- Fig. 573755
- Fig. 575365
- Fig. 576975
- Fig. 578585
- Fig. 580195
- Fig. 581805
- Fig. 583415
- Fig. 585025
- Fig. 586635
- Fig. 588245
- Fig. 589855
- Fig. 591465
- Fig. 593075
- Fig. 594685
- Fig. 596295
- Fig. 597905
- Fig. 599515
- Fig. 601125
- Fig. 602735
- Fig. 604345
- Fig. 605955
- Fig. 607565
- Fig. 609175
- Fig. 610785
- Fig. 612395
- Fig. 614005
- Fig. 615615
- Fig. 617225
- Fig. 618835
- Fig. 620445
- Fig. 622055
- Fig. 623665
- Fig. 625275
- Fig. 626885
- Fig. 628495
- Fig. 630105
- Fig. 631715
- Fig. 633325
- Fig. 634935
- Fig. 636545
- Fig. 638155
- Fig. 639765
- Fig. 641375
- Fig. 642985
- Fig. 644595
- Fig. 646205
- Fig. 647815
- Fig. 649425
- Fig. 651035
- Fig. 652645
- Fig. 654255
- Fig. 655865
- Fig. 657475
- Fig. 659085
- Fig. 660695
- Fig. 662305
- Fig. 663915
- Fig. 665525
- Fig. 667135
- Fig. 668745
- Fig. 670355
- Fig. 671965
- Fig. 673575
- Fig. 675185
- Fig. 676795
- Fig. 678405
- Fig. 680015
- Fig. 681625
- Fig. 683235
- Fig. 684845
- Fig. 686455
- Fig. 688065
- Fig. 689675
- Fig. 691285
- Fig. 692895
- Fig. 694505
- Fig. 696115
- Fig. 697725
- Fig. 699335
- Fig. 700945
- Fig. 702555
- Fig. 704165
- Fig. 705775
- Fig. 707385
- Fig. 708995
- Fig. 710605
- Fig. 712215
- Fig. 713825
- Fig. 715435
- Fig. 717045
- Fig. 718655
- Fig. 720265
- Fig. 721875
- Fig. 723485
- Fig. 725095
- Fig. 726705
- Fig. 728315
- Fig. 729925
- Fig. 731535
- Fig. 733145
- Fig. 734755
- Fig. 736365
- Fig. 737975
- Fig. 739585
- Fig. 741195
- Fig. 742805
- Fig. 744415
- Fig. 746025
- Fig. 747635
- Fig. 749245
- Fig. 750855
- Fig. 752465
- Fig. 754075
- Fig. 755685
- Fig. 757295
- Fig. 758905
- Fig. 760515
- Fig. 762125
- Fig. 763735
- Fig. 765345
- Fig. 766955
- Fig. 768565
- Fig. 770175
- Fig. 771785
- Fig. 773395
- Fig. 775005
- Fig. 776615
- Fig. 778225
- Fig. 779835
- Fig. 781445
- Fig. 783055
- Fig. 784665
- Fig. 786275
- Fig. 787885
- Fig. 789495
- Fig. 791105
- Fig. 792715
- Fig. 794325
- Fig. 795935
- Fig. 797545
- Fig. 799155
- Fig. 800765
- Fig. 802375
- Fig. 803985
- Fig. 805595
- Fig. 807205
- Fig. 808815
- Fig. 810425
- Fig. 812035
- Fig. 813645
- Fig. 815255
- Fig. 816865
- Fig. 818475
- Fig. 820085
- Fig. 821695
- Fig. 823305
- Fig. 824915
- Fig. 826525
- Fig. 828135
- Fig. 829745
- Fig. 831355
- Fig. 832965
- Fig. 834575
- Fig. 836185
- Fig. 837795
- Fig. 839405
- Fig. 841015
- Fig. 842625
- Fig. 844235
- Fig. 845845
- Fig. 847455
- Fig. 849065
- Fig. 850675
- Fig. 852285
- Fig. 853895
- Fig. 855505
- Fig. 857115
- Fig. 858725
- Fig. 860335
- Fig. 861945
- Fig. 863555
- Fig. 865165
- Fig. 866775
- Fig. 868385
- Fig. 870000
- Fig. 871615
- Fig. 873230
- Fig. 874845
- Fig. 876460
- Fig. 878075
- Fig. 879690
- Fig. 881305
- Fig. 882920
- Fig. 884535
- Fig. 886150
- Fig. 887765
- Fig. 889380
- Fig. 890995
- Fig. 892610
- Fig. 894225
- Fig. 895840
- Fig. 897455
- Fig. 899070
- Fig. 900685
- Fig. 902300
- Fig. 903915
- Fig. 905530
- Fig. 907145
- Fig. 908760
- Fig. 910375
- Fig. 911990
- Fig. 913605
- Fig. 915220
- Fig. 916835
- Fig. 918450
- Fig. 920065
- Fig. 921680
- Fig. 923295
- Fig. 924910
- Fig. 926525
- Fig. 928140
- Fig. 929755
- Fig. 931370
- Fig. 932985
- Fig. 934600
- Fig. 936215
- Fig. 937830
- Fig. 939445
- Fig. 941060
- Fig. 942675
- Fig. 944290
- Fig. 945905
- Fig. 947520
- Fig. 949135
- Fig. 950750
- Fig. 952365
- Fig. 953980
- Fig. 955595
- Fig. 957210
- Fig. 958825
- Fig. 960440
- Fig. 962055
- Fig. 963670
- Fig. 965285
- Fig. 966900
- Fig. 968515
- Fig. 970130
- Fig. 971745
- Fig. 973360
- Fig. 974975
- Fig. 976590
- Fig. 978205
- Fig. 979820
- Fig. 981435
- Fig. 983050
- Fig. 984665
- Fig. 986280
- Fig. 987895
- Fig. 989510
- Fig. 991125
- Fig. 992740
- Fig. 994355
- Fig. 995970
- Fig. 997585
- Fig. 999200
- Fig. 1000815
- Fig. 1002430
- Fig. 1004045
- Fig. 1005660
- Fig. 1007275
- Fig. 1008890
- Fig. 1010505
- Fig. 1012120
- Fig. 1013735
- Fig. 1015350
- Fig. 1016965
- Fig. 1018580
- Fig. 1020195
- Fig. 1021810
- Fig. 1023425
- Fig. 1025040
- Fig. 1026655
- Fig. 1028270
- Fig. 1029885
- Fig. 1031500
- Fig. 1033115
- Fig. 1034730
- Fig. 1036345
- Fig. 1037960
- Fig. 1039575
- Fig. 1041190
- Fig. 1042805
- Fig. 1044420
- Fig. 1046035
- Fig. 1047650
- Fig. 1049265
- Fig. 1050880
- Fig. 1052495
- Fig. 1054110
- Fig. 1055725
- Fig. 1057340
- Fig. 1058955
- Fig. 1060570
- Fig. 1062185
- Fig. 1063800
- Fig. 1065415
- Fig. 1067030
- Fig. 1068645
- Fig. 1070260
- Fig. 1071875
- Fig. 1073490
- Fig. 1075105
- Fig. 1076720
- Fig. 1078335
- Fig. 1079950
- Fig. 1081565
- Fig. 1083180
- Fig. 1084795
- Fig. 1086410
- Fig. 1088025
- Fig. 1089640
- Fig. 1091255
- Fig. 1092870
- Fig. 1094485
- Fig. 1096100
- Fig. 1097715
- Fig. 1099330
- Fig. 1100945
- Fig. 1102560
- Fig. 1104175
- Fig. 1105790
- Fig. 1107405
- Fig. 1109020
- Fig. 1110635
- Fig. 1112250
- Fig. 1113865
- Fig. 1115480
- Fig. 1117095
- Fig. 1118710
- Fig. 1120325
- Fig. 1121940
- Fig. 1123555
- Fig. 1125170
- Fig. 1126785
- Fig. 1128400
- Fig. 1129915
- Fig. 1131530
- Fig. 1133145
- Fig. 1134760
- Fig. 1136375
- Fig. 1137990
- Fig. 1139605
- Fig. 1141220
- Fig. 1142835
- Fig. 1144450
- Fig. 1146065
- Fig. 1147680
- Fig. 1149295
- Fig. 1150910
- Fig. 1152525
- Fig. 1154140
- Fig. 1155755
- Fig. 1157370
- Fig. 1158985
- Fig. 1160600
- Fig. 1162215
- Fig. 1163830
- Fig. 1165445
- Fig. 1167060
- Fig. 1168675
- Fig. 1170290
- Fig. 1171905
- Fig. 1173520
- Fig. 1175135
- Fig. 1176750
- Fig. 1178365
- Fig. 1179980





Fig.S4

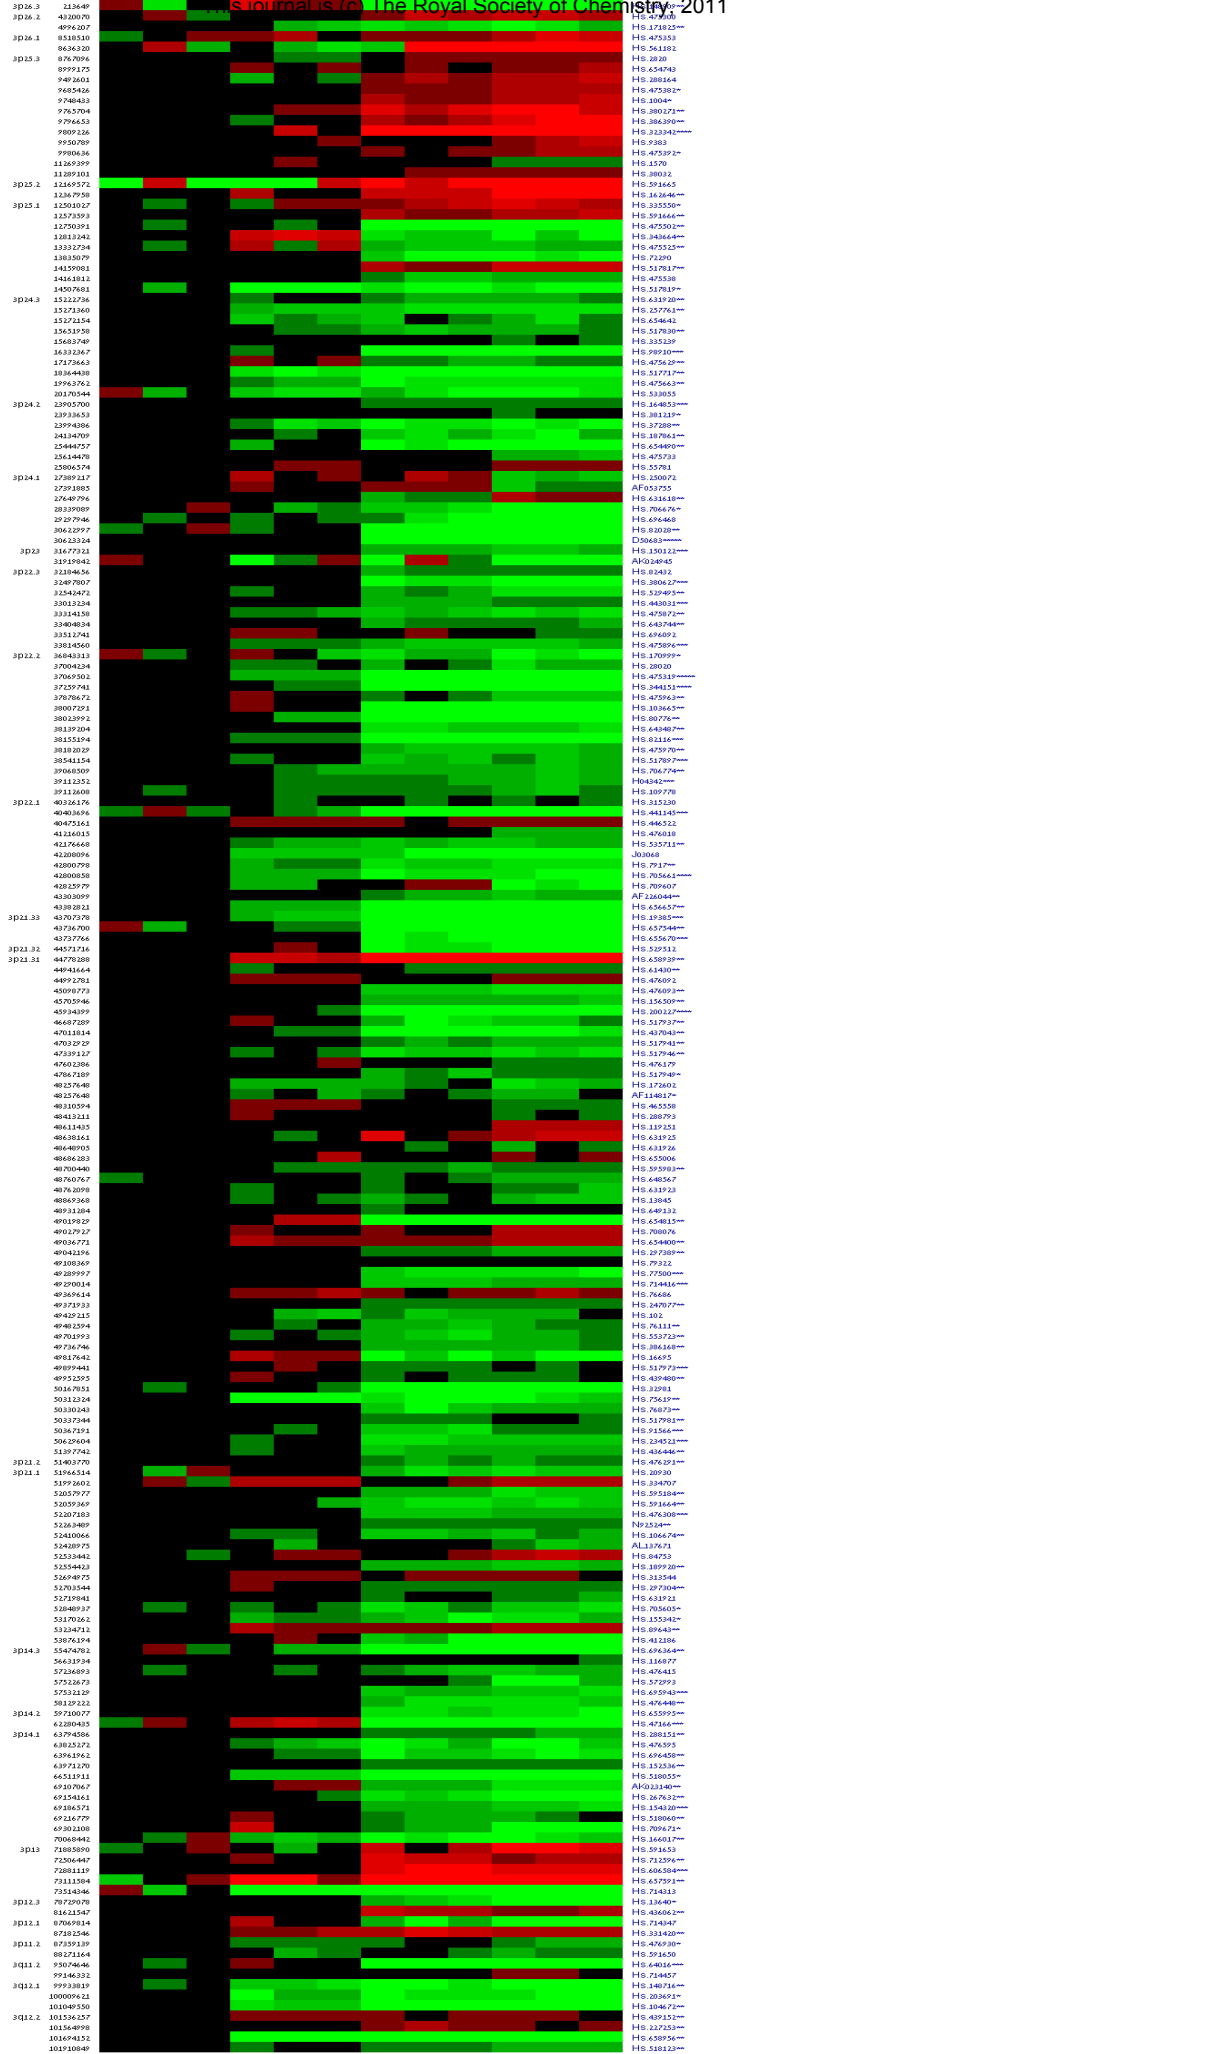

**Figure S5**

The probability of obtaining an overlap of size  $k$  randomly between two sub-populations of size  $l$  and  $f$  within a population of size  $m$  can be calculated as follows:

$$P(n=k) = \frac{\binom{m}{l} \binom{l}{k} \binom{m-l}{f-k}}{\binom{m}{f} \binom{m}{l}}$$

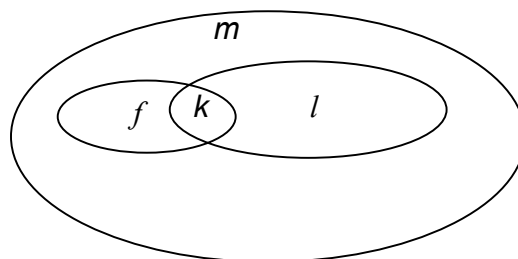

Hence, the probability of obtaining an overlap of 105 or more genes randomly between the genes participating in the apoptotic network with at least 2 fold reduced expression in the BP cells (183 genes) and all the genes located in large reduced regions (1292 out of 6567 significant genes passed t-test analysis) can be calculated as shown below:

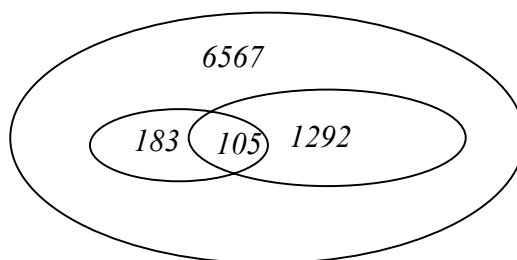

$$P(n > k) = \sum_{k=105}^{183} \frac{\binom{6567}{1292} \binom{1292}{k} \binom{6567-1292}{183-k}}{\binom{6567}{183} \binom{6567}{1292}} = 3.0 \times 10^{-30}$$

**Fig S5. Probability of random overlap between genes participating in the apoptotic network with at least 2 fold reduced expression in the BP cells and all the BP genes located in large reduced regions.**

**Calculation of contribution of global chromosomal alterations to the changes in the general enzymatic activity of the transformed BP cells**

BP cells proliferate much more rapidly than K and E cells but have similar ATP levels and similar rates of O<sub>2</sub> and glucose consumption<sup>1</sup>. The overall reduction in gene expression in BP cells apparently led to a reduction in protein concentration, thereby modifying the general enzymatic activity or “flux” inside the cell. Enzymatic flux is defined as the rate of flow into and out of the pool of metabolites in the cell and is a function of all the enzymes participating in a particular network. We hypothesize that the energy conserved by the shrinkage of many processes, such as cap-dependent translation and apoptosis, was channeled toward rapid cell proliferation<sup>1,2</sup>. In this section we examine this hypothesis, by calculating the changes in the enzymatic flux during transformation. Since enzymatic activity is ATP dependent, a reduction in flux represents a saving in ATP.

In order to estimate the changes in general enzymatic flux inside the BP cells that result from the overall decrease in gene expression (where “general flux” is an ensemble of fluxes inside the cell), we used the equation derived by Rasnick et al.<sup>3</sup>. First we demonstrated that this equation is correct for networks of interlocking pathways as well as for linear pathways. We then estimated the influence of the global chromosomal aberrations in BP cells on the general enzymatic flux in these cells.

*Derivation of flux equation for networks:* The equation of Rasnick et al.<sup>3</sup> calculates changes in general flux inside a cell during the transformation process. To derive the equation, Rasnick et al. used a theory that was developed by Kacser and Burns and Heinrich and Rapoport for the analysis of phenotypes generated by complex assembly lines for genes<sup>4-7</sup>.



Every organism can be viewed as a complex network, consisting of a large array of specific and saturable catalysts organized into diverging and converging pathways, all transforming molecular species and resulting in a flow of metabolites <sup>7</sup>. Therefore we performed a revised analysis of enzymatic flux, which avoids the assumption of linearity of the system. Using the theory of “The control of flux” <sup>8</sup>, we provide below a new derivation of Rasnick’s equation <sup>3</sup>:

$$\frac{1}{Fa} = 1 - \phi + \frac{\phi}{\pi}$$

assessing the flux changes during transformation ( see section “New derivation of the equation  $\frac{1}{Fa} = 1 - \phi + \frac{\phi}{\pi}$  ”). Fa is the enzymatic flux of eukaryotic cell resulting from aneuploidy. A diploid cell has enzymatic flux, F=1. The  $1 - \phi$  term represents the fraction of unaffected gene products. The composite term  $\frac{\phi}{\pi}$  is the fraction,  $\phi$ , of gene products undergoing a  $\pi$ -fold change in expression.

*New derivation of the equation*  $\frac{1}{Fa} = 1 - \phi + \frac{\phi}{\pi}$

A change in the rate of an enzymatic reaction is equivalent to a change in the concentration of the enzyme <sup>8</sup>. The symbol  $\Delta E_i$  refers to a small change and is applied to the concentration of any enzyme,  $E_i$ ; and  $\Delta F_j$  is the net effect on any flux  $F_j$ , anywhere in the system.

The ratio  $\frac{\Delta F_j / F_j}{\Delta E_i / E_i}$  represents the effectiveness of  $E_i$  in controlling the flux  $F_j$  <sup>8</sup>.

(1)

$$\frac{dF_j/F_j}{dE_i/E_i} = C_i$$

$C_i$  can be described as the flux control coefficient of the system flux with respect to enzyme concentration. According to the flux summation theorem<sup>8</sup>, the sum of all the flux control coefficients is equal to unity. This means that for almost all enzymes a reduction in the quantity or activity of an individual enzyme does not have an appreciable effect on the overall cellular flux<sup>8</sup>. Indeed, all the enzymes are “in excess”, so a reduction in the activity of an enzyme hardly affects the output. Moreover, the heterozygote usually differs very little from the wild type homozygote when pool sizes and fluxes are measured<sup>7</sup>. Therefore the coefficients of the system enzymes are all smaller than unity and the sum of their coefficients approaches 1<sup>8</sup>:

$$\sum_{i \rightarrow n} C_i = 1$$

Thus, for a system at least as complex as a cell, each enzyme makes only a small individual contribution to the general flux.

Eqn. 1 can be rearranged to eqn. 2:

$$F = \frac{dF * E_i}{C_i * dE_i} \quad (2)$$

For n enzymes participating in a specific network we arrive at eqn.3:

$$\sum_{1 \rightarrow n} F = n * F = \sum_{1 \rightarrow n} \frac{dF * Ei}{Ci * dEi} \quad (3)$$

The rearrangement of eqn. 3 gives eqn. 4:

$$F = \frac{1}{n} \sum_{1 \rightarrow n} \frac{dF * Ei}{Ci * dEi} \quad (4)$$

Since each enzyme makes only a small individual contribution to the general flux, all  $E_i$  terms can be approximated by replacing them with  $E$ , the mean of all the  $E_i$ :

$$F = \frac{E}{n} \sum_{1 \rightarrow n} \frac{dF}{Ci * dE_i} \quad (5)$$

For each enzyme,  $E_i$ , the expression  $\frac{dF}{Ci * dE_i}$  remains constant under normal conditions and can be replaced with  $A_i$ . Therefore eqn. 5 can be rewritten as follows:

$$F = \frac{(E \sum_{1 \rightarrow n} A_i)}{n} \quad (6)$$

We can represent the sum of all the  $A_i$  (where  $A_i$  represents the effect of a change in the concentration of the enzyme on general flux) by a term  $W$  to give:

$$F = \frac{E * W}{n} \quad \text{or}$$

$$\frac{W}{F} = \frac{n}{E} \quad (7)$$

Since the production of gene products is approximately proportional to gene dose<sup>3</sup> the fluxes in eqn. 7 can be partitioned (similarly to the concept of Rasnick et al.<sup>3</sup>) into those that are affected by aneuploidy and those that are not:

$$\frac{W}{Fa} = \frac{n-m}{E} + \frac{m}{\pi E} \quad (8)$$

Fa is the phenotype of a eukaryotic cell resulting from aneuploidy. The number of genes experiencing a change in expression levels due to aneuploidy is m. The variable  $\pi$  is the segmental ploidy factor, reflecting the change in the number of gene copies or expression levels for m. The difference n-m is the number of genes not experiencing aneuploidy or a change in gene expression<sup>3</sup>. Eqn. (8) can be divided by eqn. (7) to arrive at eqn. (9)

$$\frac{F}{Fa} = \frac{n-m + \frac{m}{\pi}}{n} = 1 - \frac{m}{n} + \frac{m}{n\pi} \quad (9)$$

Setting the normal phenotype F=1 and replacing the expression m/n with  $\phi$ , we get eqn. 10<sup>3</sup>:

$$\frac{1}{Fa} = 1 - \phi + \frac{\phi}{\pi} \quad (10)$$

*Calculation of altered flux in BP cells:* 2199 significant genes out of the 8842 valid transcripts that passed t-test analysis were expressed at least twofold higher and 2902 genes were expressed at least twofold lower in BP cells in comparison with keratinocytes<sup>2</sup>. Thus, the calculated relative flux for the BP cells is:

$$\frac{1}{Fa} = 1 - \frac{2199}{8843} - \frac{2902}{8843} + \frac{2199}{8843 * 2} + \frac{2902}{8843 * 0.5} = 1.23$$
$$Fa = 0.82$$

Thus BP cells had a 18% decrease in general enzymatic flux compared to keratinocytes.

*Flux change due to global chromosomal alterations:* In order to estimate the contribution of global chromosomal changes to the change in flux in BP cells, we determined how many transcripts with significantly altered expression were located in chromosomal regions with coordinately altered expression. 2902 transcripts were significantly reduced in BP cells versus keratinocytes<sup>2</sup>. Of these, 1292 (44%) mapped to large chromosomal regions with coordinately altered expression. 2199 transcripts were significantly induced in BP cells<sup>2</sup>, and of these 901 (41%) were located in large chromosomal regions with coordinately altered expression. The theoretical contribution of these transcripts to the change in the enzymatic flux of BP cells is :

$$\frac{1}{Fa} = 1 - \frac{1292}{8843} - \frac{901}{8843} + \frac{1292}{8843 * 0.5} + \frac{901}{8843 * 2} = 1.094$$
$$Fa = 0.91$$

Thus, a loss of flux in BP cells of 9% can be attributed to global chromosomal changes, as defined by the DIGMAP software. This minimal estimate, based on our stringent criteria for defining a chromosomal region with coordinately changed expression, indicates that at least half of the change in enzymatic flux in BP cells in comparison with keratinocytes (9% out of 18%) is due to global chromosomal alterations.

**References for Supplemental data:**

1. S. Mizrachy-Schwartz, N. Kravchenko-Balasha, H. Ben-Bassat, S. Klein and A. Levitzki, *PLoS One*, 2007, **2**, e628.
2. N. Kravchenko-Balasha, S. Mizrachy-Schwartz, S. Klein and A. Levitzki, *J Biol Chem*, 2009, **284**, 11717-11727.
3. D. Rasnick and P. H. Duesberg, *Biochem J*, 1999, **340 ( Pt 3)**, 621-630.
4. H. Kacser and J. A. Burns, *Symp Soc Exp Biol*, 1973, **27**, 65-104.
5. R. Heinrich and T. A. Rapoport, *Acta Biol Med Ger*, 1973, **31**, 479-494.
6. R. Heinrich and T. A. Rapoport, *Eur J Biochem*, 1974, **42**, 89-95.
7. H. Kacser and J. A. Burns, *Genetics*, 1981, **97**, 639-666.
8. H. Kacser and J. A. Burns, *Biochem Soc Trans*, 1995, **23**, 341-366.

**Table SI**

| The amplified locus                                | Primers                                                                                                                                                                                                 |
|----------------------------------------------------|---------------------------------------------------------------------------------------------------------------------------------------------------------------------------------------------------------|
| E6 gene                                            | E6-5': 5' tgtactgcaagcaacagttac 3'<br>E6-3': 5' gcaacaagacatacatcgac 3'                                                                                                                                 |
| E7 gene                                            | E7-5': 5' ggagatacacctacattg 3'<br>E7 -3': 5' gtgtgccattaacaggtct 3'                                                                                                                                    |
| E1 gene                                            | E1-5': 5' ggatgctatatcagatgacg 3'<br>E1-3': 5' ctacctgtaacatctgctg 3'                                                                                                                                   |
| E2 gene                                            | E2-5': 5' gtacagacctacgtgacct 3'<br>E2-3': 5' catatgtaagtgaacaattgc 3'                                                                                                                                  |
| E5 gene (nested PCR)                               | outer primers: E5-5': 5' gatagtgaatggcaacg 3'<br>and E5 -3': 5' ggtggacatgtacctgctg 3';<br>inner primers: E5in-5': 5' ctattacagtgtctactgg<br>3', E5in -3': 5' cgcagaggtgctgttatcc 3'                    |
| L1 gene                                            | L1-1-5': 5' acggatgaatatgttgc 3' and L1-1-3':<br>5' tgtaatccatagatatac 3';<br>L1-2-5': 5' ggtgattgtccaccattagag 3' and L1-2-<br>3': 5' gcagttgtagaggtagatgagg 3'                                        |
| L2 gene (nested PCR)                               | L2-5': 5' gctggtgcaccaacatc 3' and L2-3': 5'<br>gcaacatattcatccgt3'<br>L2in-5': 5' catctgtattgcagcctcc 3' and L2in-3':<br>5' gacaggaggcaagtagacag 3'                                                    |
| Boundary of the viral insertion within the L2 gene | From E5 gene: E5L2 5': 5'<br>caggcaggtacatgtccacc 3';<br>From L2 gene: E5L2A 3': 5'<br>ctaaatcctgatacatctg 3'; E5L2B 3': 5'<br>cctagaggttaatgctggcctatg 3'; and E5L2C 3': 5'<br>ggaatattgtatgcaccacc 3' |
| Boundary of the viral insertion within the L1 gene | From E6 gene: L1-E6 rev: 5'<br>gtaactgttgccttcagtaca 3';                                                                                                                                                |

|                                        |                                                                                                                                                                                                                                                                                                                                          |
|----------------------------------------|------------------------------------------------------------------------------------------------------------------------------------------------------------------------------------------------------------------------------------------------------------------------------------------------------------------------------------------|
|                                        | From L1 gene: : L1-E6A: 5' tgcacatgggtgtgtgc 3'; L1-E6-B: 5' gtagcgccagcgccatt 3'; and L1-E6C: 5' ctgtgttgatactacacgc 3'                                                                                                                                                                                                                 |
| Joints between the viral and human DNA | Hinc2-out: 5' ctgctaaacacagatgtaggac 3'<br>Pst1+out: 5' ctgataccacacctgctatattag 3'<br>Hinc2-in: 5' acctgaccaccgcatgaac 3'<br>Pst1+in: 5' catctgtattgcagcctcca 3'<br>L1g-forout: 5' ggaggaatatgatttacag 3'<br>L1g-revout: 5' gatatggcagcacataatgac 3'<br>L1g-forin: 5' ccttaactgcagacgttatg 3'<br>L1g-1revin: 5' gcgtgtagtatcaacaacag 3' |

**Table SI Primers used in mapping of the viral HPV16 insertion in HF1 cells.**

Primers used in PCR walking along the incorporated viral genome are shown.
